## **Urologia Internationalis**

# Urologia Internationalis

Founded by

PETER A. NARATH (1955–1962)

HEINRICH HEUSSER (1955–1967)

Editor

G. MAYOR, Zürich

Editorial Board

C. E. ALKEN, Homburg, Saar

J. J. ALVAREZ IERENA, Mexico

R. ANDERSEN, Oslo

J. AUVERT, Paris

A. BABICS, Budapest

P. BISCHOFF, Hamburg

J. BISQUERTT, Santiago

H. BOEMINGHAUS, Düsseldorf

E. BORS, Long Beach, Cal.

K. BOSHAMEZ, Bad Dürkheim

P. BRUNI, Napoli

TH. BURGHELE, Bucharest

M. CAINE, Jerusalem

A. CARNEIRO DE MOURA, Lisbon

J. C. CHRISTOFFERSEN, Copenhagen

L. CIFUENTES-DELATTE, Madrid

P. J. DENNEHY, Johannesburg

P. DEUTICKE, Wien

A. R. EL-SADR, Alexandria

J. D. FERGUSON, London

R. DE FREITAS, São Paulo

G. GIERTZ, Stockholm

S. GIL VERNET, Barcelona

H. U. GLOOR, Zürich

W. E. GOODWIN, Los Angeles, Cal.

W. GRÉGOIR, Bruxelles

I. H. GRIFFITHS, London

H. G. HANLEY, London

F. HINMAN, Jr., San Francisco, Cal.

H. HOUTAPPEL, Amsterdam

F. A. HUGHES, Montevideo

A. R. KÜSS, Paris

T. KUSUNOKI, Osaka

J. LANGE, Bordeaux

W. F. LEADBETTER, Boston, Mass.

E. LJUNGGREN, Göteborg

L. LOPEZ, Caracas

S. A. MACDONALD, Montreal

H. MARBERGER, Innsbruck

R. I. MATHIS, Buenos Aires

F. MAY, München

E. MICHALOWSKI, Kraków

J. MOMBAERTS, Bruxelles

H. MORTENSEN, Melbourne

A. MOULONGUET, Paris

A. OBERHOLTZER, Rome

O. OBRANT, Hälsingborg

V. PAČES, Prague

E. PÉREZ-CASTRO, Madrid

S. PETKOVIĆ, Belgrade

A. PUIGVERT, Barcelona

L. N. PYRAH, Leeds

A. PYTEL, Moscow

L. QUÉNU, Paris

G. RAVASINI, Padova

D. R. SMITH, San Francisco, Cal.

H. TAKAYASU, Hongo

F. TSUCHIYA, Tokyo

R. D. TURNER, Los Angeles, Cal.

R. ÜBELHÖR, Wien

A. VILLANUEVA, Mexico City

W. F. WHITMORE, New York, N.Y.

E. WILDBOLZ, Bern

D. I. WILLIAMS, London

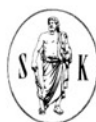

All rights, including that of translation into other languages, reserved.  
Photomechanic reproduction (photocopy, microcopy) of this volume or parts thereof  
without special permission of the publishers is prohibited.

© Copyright 1969 by S. Karger AG, Basel  
Printed in Switzerland by Buchdruckerei National-Zeitung AG, Basel  
Blocks: Abereg-Steiner & Cie. AG, Berne

# Contents

|                                                                                                                                                                                                                                                                                                                                                    |     |
|----------------------------------------------------------------------------------------------------------------------------------------------------------------------------------------------------------------------------------------------------------------------------------------------------------------------------------------------------|-----|
| AL, N.: vide KOOMAN, A.                                                                                                                                                                                                                                                                                                                            |     |
| ALBERTAZZI, A.: vide BONOMINI, V.                                                                                                                                                                                                                                                                                                                  |     |
| ANKE, M.: vide SCHNEIDER, H.-J.                                                                                                                                                                                                                                                                                                                    |     |
| BACKER, O. G.: vide HANSEN, R. I.                                                                                                                                                                                                                                                                                                                  |     |
| BALOGH, F.: vide KARÁTSON, A.                                                                                                                                                                                                                                                                                                                      |     |
| BANDHAUER, K. und MADERSBACHER, H.: Probleme der temporären Harnableitung bei operativen Eingriffen an der Harnröhre – Problems of Temporary Urinary Diversion in Urethral Surgery . . . . .                                                                                                                                                       | 97  |
| BHANDARI, R. D.; DEVLESAVER, PH.; GRÉGOIR, W. and SCHULMAN, C.: Cavernography – New Technique for Pelvic Phlebography. Preliminary Report .                                                                                                                                                                                                        | 551 |
| BISCHOFF, P. F.: The Surgical Treatment of the Solitary Kidney . . . . .                                                                                                                                                                                                                                                                           | 527 |
| BONOMINI, V.; MIOLI, V.; ALBERTAZZI, A. and VANGELISTA, A.: Aorto-cava Percutaneous Teflon Catheters System and Teflon Shunt for Repeated Haemodialysis in Severe Acute Renal Failure . . . . .                                                                                                                                                    | 30  |
| BÖTTCHER, D.: vide SCHRADER, C.-P.                                                                                                                                                                                                                                                                                                                 |     |
| BRAUER, R.: vide KOLLWITZ, A.-A.                                                                                                                                                                                                                                                                                                                   |     |
| CONSTANTINI, R.: vide HOLZKNECHT, F.                                                                                                                                                                                                                                                                                                               |     |
| CSATA, S.; GALLYAS, F.; TÓTH, M. and FRANG, D.: Rehabilitation after Poisonous Renal Failure . . . . .                                                                                                                                                                                                                                             | 111 |
| CZOPIK, J.: vide ZIELINSKI, J.                                                                                                                                                                                                                                                                                                                     |     |
| DAVIDSON, W. D.: vide KREGZDE, J.                                                                                                                                                                                                                                                                                                                  |     |
| DEBLED, G.: vide GRÉGOIR, W.                                                                                                                                                                                                                                                                                                                       |     |
| DEVLESAVER, PH.: vide BHANDARI, R. D.                                                                                                                                                                                                                                                                                                              |     |
| DWORSCHAK, W.: vide HASCHEK, H.                                                                                                                                                                                                                                                                                                                    |     |
| FLACHENECKER, G.: vide MOLNÁR, St.                                                                                                                                                                                                                                                                                                                 |     |
| FRANG, D.: vide CSATA, S.                                                                                                                                                                                                                                                                                                                          |     |
| FRICK, J.: Darstellung einer Methode («Competitive Protein Binding») zur Bestimmung des Testosteronspiegels im Plasma und Studie über den Testosteronmetabolismus beim Mann über 60 Jahre – A Method (Competitive Protein-binding) for Determination of Plasma-Testosterone Level; Study of Testosterone Metabolism in Men over 60 years . . . . . | 481 |
| GACA, A.: vide SCHRADER, C.-P.                                                                                                                                                                                                                                                                                                                     |     |
| GALLYAS, F.: vide CSATA, S.                                                                                                                                                                                                                                                                                                                        |     |
| GIANNOTTI, P.: vide TONELLI, S.                                                                                                                                                                                                                                                                                                                    |     |
| GOLDENBERG, D. M.; SIGEL, A.; SCHROTT, K. M. and WARD, V.: Cryotherapy of Heterotransplanted Human Cancer: Preliminary Experimental Findings in the Syrian Hamster . . . . .                                                                                                                                                                       | 166 |
| GRÉGOIR, W.: Hemostatic Adenomectomy . . . . .                                                                                                                                                                                                                                                                                                     | 426 |
| GRÉGOIR, W.: Traitement chirurgical du reflux congénital et du méga-uretère primaire – Surgical Management of Congenital Reflux and Primary Megaureter . . . . .                                                                                                                                                                                   | 502 |
| GRÉGOIR, W. et DEBLED, G.: L'Étiologie du reflux congénital et du méga-uretère primaire – The Etiology of Congenital Reflux and Primary Megaureter . . . . .                                                                                                                                                                                       | 119 |
| GRÉGOIR, W.: vide BHANDARI, R. D.                                                                                                                                                                                                                                                                                                                  |     |

|                                                                                                                                                                                                                                                                                                |     |
|------------------------------------------------------------------------------------------------------------------------------------------------------------------------------------------------------------------------------------------------------------------------------------------------|-----|
| GRÉTILLAT, P.: vide MOSER, R.                                                                                                                                                                                                                                                                  |     |
| HANSEN, R. I.; LUND, F. and BACKER, O. G.: Cryosurgery of the Prostate . . .                                                                                                                                                                                                                   | 160 |
| HASCHEK, H. und DWORSCHAK, W.: Vereisung der Prostata – Prostatic Freezing                                                                                                                                                                                                                     | 153 |
| HINSBERGH, W. C. M. VAN: vide KOOMAN, A.                                                                                                                                                                                                                                                       |     |
| HOLZKNECHT, F.; SPÖTTL, F.; CONSTANTINI, R. und MARBERGER, H.: Die<br>fibrinolytisch bedingte Hämorrhagie in der Urologie – Urinary Hemorrhage<br>Provoked by Fibrinolysis . . . . .                                                                                                           | 385 |
| HUTCH, J. A. and SMITH, D. R.: Sterile Reflux: Report of 24 Cases . . . . .                                                                                                                                                                                                                    | 460 |
| KARÁTON, A.; BALOGH, F. and PINTÉR, J.: Corroborating the Effect of Mannitol<br>Treatment with Hibernation. The Problem of Hydropic Degeneration . . . . .                                                                                                                                     | 45  |
| KAUFMAN, J. J.; LUPU, A. N. and MAXWELL, M. H.: Further Experiences in the<br>Diagnosis and Treatment of Renovascular Hypertension. Part. I. Clinical<br>Characteristics and Diagnostic Approaches . . . . .                                                                                   | 1   |
| KAUFMAN, J. J.; LUPU, A. N. and MAXWELL, M. H.: Further Experiences in the<br>Diagnosis and Treatment of Renovascular Hypertension. Part. II. Surgical<br>Treatment of Hypertension Secondary to Renal Artery Stenosis . . . . .                                                               | 12  |
| KELÁMI, A. und KIRSTAEDTER, H. J.: Erste Erfahrungen mit der Franzén-<br>Nadel in der Diagnose des Prostatakarzinoms – Initial Results with the<br>Franzén-Needle in the Diagnosis of Prostatic Carcinoma . . . . .                                                                            | 560 |
| KELÁMI, A. und TAENZER, V.: Fehlinterpretationen bei der Harnblasenangi-<br>ographie – Erroneous Interpretation in Urinary Vesical Angiography . . .                                                                                                                                           | 349 |
| KIRSTAEDTER, H. J.: vide KELÁMI, A.                                                                                                                                                                                                                                                            |     |
| KOFLER, K.: Morphologische Befunde zur Kryochirurgie der adenomatösen so-<br>genannten Prostatahypertrophie und des Karzinoms der menschlichen<br>Prostata – Morphologic Findings Following Cryosurgery for So-called<br>Adenomatous Hypertrophy and Carcinoma of the Human Prostate . . . . . | 439 |
| KOLLWITZ, A.-A.; KRACHT, H.; BRAUER, R. und LÖHE, E.: Klinische und<br>Laborbefunde bei 470 Patienten mit Kalziumsteinen der oberen Harn-<br>wege – Calculithiasis of the Upper Urinary Passages . . . . .                                                                                     | 318 |
| KOOMAN, A.; AL, N.; HINSBERGH, W. C. M. VAN; STEKELENBURG, L. H. M. VAN;<br>TRUYENS, J. H. J. and VALS, G. H. VAN: Renogram and Clinician . . . . .                                                                                                                                            | 37  |
| KOTAKE, T.: vide TAKEUCHI, M.                                                                                                                                                                                                                                                                  |     |
| KRACHT, H.: vide KOLLWITZ, A.-A.                                                                                                                                                                                                                                                               |     |
| KREGZDE, J.; LAMBERT, L. L. and DAVIDSON, W. D.: Lysozymuria in Renal<br>Calculosis Following Spinal Cord Injury . . . . .                                                                                                                                                                     | 310 |
| KUŽNIK, Z.: Einfluss der Entfernung von Nebenhodenkopf und Nebenhoden-<br>schwanz sowie der Durchtrennung des Samenleiters auf die Spermato-<br>genese bei Ratten – Effect of Removal of Epididymal Head and Tail and<br>Division of Spermatic Cord on Spermatogenesis in the Rat . . . . .    | 372 |
| LAISSUE, J.: vide MOSER, R.                                                                                                                                                                                                                                                                    |     |
| LAMBERT, L. L.: vide KREGZDE, J.                                                                                                                                                                                                                                                               |     |
| LANGE, K. P.: vide MOLNÁR, St.                                                                                                                                                                                                                                                                 |     |
| LÖHE, E.: vide KOLLWITZ, A.-A.                                                                                                                                                                                                                                                                 |     |
| LUND, F.: vide HANSEN, R. I.                                                                                                                                                                                                                                                                   |     |
| LUPU, A. N.: vide KAUFMAN, J. J.                                                                                                                                                                                                                                                               |     |
| LUTZEYER, W. und MELCHIOR, H.: Die Wertigkeit urodynamischer Unter-<br>suchungsmethoden – Evaluation of Urodynamic Investigative Methods . . .                                                                                                                                                 | 289 |
| MADERSBACHER, H.: vide BANDHAUER, K.                                                                                                                                                                                                                                                           |     |
| MAJESKY, I.; STOJKOVIČ, J. und PAYER, J.: Zum Verschluss von Fisteln nach<br>Denis Browne'scher Hypospadie-Korrektur – Closure of Urethral Fistula<br>Using Denis Browne's Technic of Hypospadias Correction . . . . .                                                                         | 135 |
| MARATHE, R. L.: vide YANG, Y. H.                                                                                                                                                                                                                                                               |     |
| MARBERGER, H.: vide HOLZKNECHT, F.                                                                                                                                                                                                                                                             |     |

|                                                                                                                                                                                                                                                                                                                                        |     |
|----------------------------------------------------------------------------------------------------------------------------------------------------------------------------------------------------------------------------------------------------------------------------------------------------------------------------------------|-----|
| MAXWELL, M. H.: vide KAUFMAN, J. J.                                                                                                                                                                                                                                                                                                    |     |
| MELCHIOR, H.: vide Lutzeyer, W.                                                                                                                                                                                                                                                                                                        |     |
| MIOLI, V.: vide BONOMINI, V.                                                                                                                                                                                                                                                                                                           |     |
| MOLNÁR, ST.; FLACHENECKER, G.; LANGE, K. P. und ZIEMANN, J. H.: Kryochirurgie unter Sichtkontrolle – Cryosurgery with Visual Control . . . . .                                                                                                                                                                                         | 177 |
| MOSER, R.; LAISSUE, J.; GRÉTILLAT, P. und WILDBOLZ, E.: Malakoplakie der Harnblase: Histologische, zytologische und elektronenmikroskopische Untersuchungen – Malakoplakia of the Bladder: Histologic, Cytologic and Electronmicroscopic Studies . . . . .                                                                             | 355 |
| OHKAWA, T.: vide TAKEUCHI, M.                                                                                                                                                                                                                                                                                                          |     |
| PAYER, K.; STOJKOVIČ, J. und RUDOLF, V.: Die geburts-traumatische Nierenruptur beim Neugeborenen – Intranatal Renal Rupture in the Newborn                                                                                                                                                                                             | 58  |
| PAYER, J.: vide MAJESKY, I.                                                                                                                                                                                                                                                                                                            |     |
| PINTÉR, J.: vide KARÁTON, A.                                                                                                                                                                                                                                                                                                           |     |
| REUTER, H.: Die Kältechirurgie im Rahmen der Prostataoperationen – Cryosurgery of the Prostate . . . . .                                                                                                                                                                                                                               | 145 |
| RUDOLF, V.: vide PAYER, J.                                                                                                                                                                                                                                                                                                             |     |
| SCHNEIDER, H.-J. und ANKE, M.: Der Mineralstoffgehalt kompensatorisch hypertrophierter Nieren beim wachsenden Tier – The Mineral Content of the Surviving Hypertrophied Kidney in the Growing Animal . . . . .                                                                                                                         | 300 |
| SCHNEIDER, H.-J.; SCHULZE, M. und THIELMANN, K.: Biochemische und klinische Aspekte des Pyrophosphatstoffwechsels. 3. Die Pyrophosphatase-Aktivität der Nieren bei Harnsteinträgern und Gesunden – Biochemical and Clinical Aspects of Phosphate Metabolism. Renal Pyrophosphatase Activity in Calculous and Healthy Persons . . . . . | 66  |
| SCHRADER, C.-P.; GACA, A. und BÖTTCHER, D.: Kombinierte mechanische und medikamentöse Blutstillung bei der Prostataktomie – Combined Mechanical and Pharmaceutical Control of Bleeding in Prostatectomy . . . . .                                                                                                                      | 418 |
| SCHROTT, K. M.: vide GOLDENBERG, D. M.                                                                                                                                                                                                                                                                                                 |     |
| SCHULMAN, C.: vide BHANDARI, R. D.                                                                                                                                                                                                                                                                                                     |     |
| SCHULZE, M.: vide SCHNEIDER, H.-J.                                                                                                                                                                                                                                                                                                     |     |
| SIGEL, A.: vide GOLDENBERG, D. M.                                                                                                                                                                                                                                                                                                      |     |
| SKJOLDBORG, H.: Das Problem Anurie oder mechanische Abflusshindernisse – The Problem Anuria or Mechanical Obstruction of Flow . . . . .                                                                                                                                                                                                | 139 |
| SMITH, D. R.: vide HUTCH, J. A.                                                                                                                                                                                                                                                                                                        |     |
| SONODA, T.: vide TAKEUCHI, M.                                                                                                                                                                                                                                                                                                          |     |
| SPÖTTL, F.: vide HOLZKNECHT, F.                                                                                                                                                                                                                                                                                                        |     |
| STEKELBURG, L. H. M. VAN: vide KOOMAN, A.                                                                                                                                                                                                                                                                                              |     |
| STOJKOVIČ, J.: vide MAJESKY, I.                                                                                                                                                                                                                                                                                                        |     |
| STOJKOVIČ, J.: vide PAYER, J.                                                                                                                                                                                                                                                                                                          |     |
| STROHMENGER, P.: Zur Nomenklatur des kongenitalen Megalureters – Nomenclature of Congenital Megalureter . . . . .                                                                                                                                                                                                                      | 344 |
| SZKODNY, A.: vide ZIELINSKI, J.                                                                                                                                                                                                                                                                                                        |     |
| TAENZER, V.: vide KELÁMI, A.                                                                                                                                                                                                                                                                                                           |     |
| TAKAYASU, H.: vide YOKOYAMA, M.                                                                                                                                                                                                                                                                                                        |     |
| TAKEUCHI, M.; OHKAWA, T.; KOTAKE, T.; YACHIKU, S. und SONODA, T.: Localization of Phosphaturic Action in the Nephron of Patients with Primary Hyperparathyroidism . . . . .                                                                                                                                                            | 466 |
| THIELMANN, K.: vide SCHNEIDER, H.-J.                                                                                                                                                                                                                                                                                                   |     |
| TONELLI, S. und GIANNOTTI, P.: On the Nature of Xantogranulomatous Pyelonephritis . . . . .                                                                                                                                                                                                                                            | 330 |
| TÓTH, M.: vide CSATA, S.                                                                                                                                                                                                                                                                                                               |     |
| TRUYENS, J. H. J.: vide KOOMAN, A.                                                                                                                                                                                                                                                                                                     |     |

|                                                                                                                                                      |                   |
|------------------------------------------------------------------------------------------------------------------------------------------------------|-------------------|
| VALS, G. H. VAN: vide KOOMAN, A.                                                                                                                     |                   |
| VANGELISTA, A.: vide BONOMINI, V.                                                                                                                    |                   |
| VEYS, CH. A.: Aetiology of Tumours of the Urinary Bladder . . . . .                                                                                  | 276               |
| WARD, V.: vide GOLDENBERG, D. M.                                                                                                                     |                   |
| WILDBOLZ, E.: vide MOSER, R.                                                                                                                         |                   |
| YACHIKU, S.: vide TAKEUCHI, M.                                                                                                                       |                   |
| YANG, Y. H. and MARATHE, R. L.: Malacoplakia of the Testis and Epididymis<br>(Macrophagic-Inclusion Epididymo-orchitis) . . . . .                    | 364               |
| YOKOYAMA, M. and TAKAYASU, H.: An Electron Microscopic Study of the Human<br>Adrenal Medulla and Pheochromocytoma . . . . .                          | 79                |
| ZIELINSKI, J.; CZOPIK, J. und SZKODNY, A.: Die Wiederherstellung der weib-<br>lichen Harnröhre – Reconstruction of the Female Urethra . . . . .      | 73                |
| ZIEMANN, J. H.: vide MOLNÁR, ST.                                                                                                                     |                   |
| ZINGG, E. J.: Rekonstruktion der Harnblase in Experiment und Klinik – Experi-<br>mental and Clinical Reconstruction of the Urinary Bladder . . . . . | 193               |
| Book Reviews/Buchbesprechungen/Livres Nouveaux . . . . .                                                                                             | 96, 188, 384, 478 |
| Congresses/Kongresse/Congrès . . . . .                                                                                                               | 192, 569          |
| Subject Index . . . . .                                                                                                                              | 570               |
